# Supplementary material for: Relationship between Spatiotemporal Dynamics of the Brain at Rest and Self-Reported Spontaneous Thoughts: An EEG Microstate Approach
Source: MDPI journal article supplement (doi:10.3390/jpm11111216), 2021-11-17
Supplement: s1 [file s1]

## Supplementary Materials

**Table S1.** The results of two-way ANOVA for the duration parameter.

| Duration                   |           |       |              |           |
|----------------------------|-----------|-------|--------------|-----------|
|                            | F(df)     |       | p            | $\eta^2p$ |
| Age                        | F(1, 194) | 3.926 | <b>0.049</b> | 0.020     |
| Gender                     | F(1, 194) | 4.380 | <b>0.038</b> | 0.022     |
| Microstate                 | F(6, 194) | 2.292 | 0.089        | 0.012     |
| Microstate $\times$ Age    | F(6, 194) | 1.254 | 0.289        | 0.006     |
| Microstate $\times$ Gender | F(6, 194) | 1.232 | 0.296        | 0.006     |

Significant results are highlighted in bold.

**Table S2.** The results of two-way ANOVA for the occurrence parameter.

| Occurrence                 |           |       |                   |           |
|----------------------------|-----------|-------|-------------------|-----------|
|                            | F(df)     |       | p                 | $\eta^2p$ |
| Age                        | F(1, 194) | 4.432 | <b>0.037</b>      | 0.022     |
| Gender                     | F(1, 194) | 3.377 | 0.068             | 0.017     |
| Microstate                 | F(6, 194) | 5.908 | <b>&lt;0.0005</b> | 0.030     |
| Microstate $\times$ Age    | F(6, 194) | 0.816 | 0.523             | 0.004     |
| Microstate $\times$ Gender | F(6, 194) | 1.921 | 0.099             | 0.010     |

Significant results are highlighted in bold.

**Table S3.** The results of two-way ANOVA for the duration parameter.

| Coverage                   |           |       |              |           |
|----------------------------|-----------|-------|--------------|-----------|
|                            | F(df)     |       | p            | $\eta^2p$ |
| Age                        | F(1, 194) | 0.591 | 0.443        | 0.003     |
| Gender                     | F(1, 194) | 0.953 | 0.330        | 0.005     |
| Microstate                 | F(6, 194) | 3.921 | <b>0.006</b> | 0.020     |
| Microstate $\times$ Age    | F(6, 194) | 0.774 | 0.524        | 0.004     |
| Microstate $\times$ Gender | F(6, 194) | 1.815 | 0.135        | 0.009     |

Significant results are highlighted in bold.

**Table S4.** The results of two-way ANOVA for the GFP parameter.

| GFP                        |           |       |                   |           |
|----------------------------|-----------|-------|-------------------|-----------|
|                            | F(df)     |       | p                 | $\eta^2p$ |
| Age                        | F(1, 194) | 0.327 | 0.568             | 0.002     |
| Gender                     | F(1, 194) | 9.620 | <b>0.002</b>      | 0.047     |
| Microstate                 | F(6, 194) | 6.018 | <b>&lt;0.0005</b> | 0.030     |
| Microstate $\times$ Age    | F(6, 194) | 1.584 | 0.189             | 0.008     |
| Microstate $\times$ Gender | F(6, 194) | 3.291 | <b>0.018</b>      | 0.017     |

Significant results are highlighted in bold.

**Table S5.** Bayesian Pearson correlation coefficients between age and ARSQ dimensions.

|     |                  | DoM    | ToM           | Self   | Planning | Sleepi-<br>ness | Comfort | SA    | HC            | Vis    | VT     |
|-----|------------------|--------|---------------|--------|----------|-----------------|---------|-------|---------------|--------|--------|
| Age | <i>r</i>         | -0.178 | <b>-0.193</b> | -0.174 | -0.103   | -0.147          | 0.147   | 0.061 | <b>-0.198</b> | -0.080 | -0.185 |
|     | BF <sub>10</sub> | 1.967  | <b>3.520</b>  | 1.727  | 0.251    | 0.733           | 0.736   | 0.128 | <b>4.258</b>  | 0.167  | 2.530  |

Correlations with substantial evidence are highlighted in bold.

**Table S6.** Bayesian Pearson correlation coefficients between age and microstate parameters.

|                   |           | MS A          | MS B   | MS C   | MS D         | MS E      | MS F   | MS G   |
|-------------------|-----------|---------------|--------|--------|--------------|-----------|--------|--------|
| <b>Duration</b>   |           |               |        |        |              |           |        |        |
| Age               | $r$       | 0.095         | 0.181  | 0.132  | <b>0.201</b> | 0.172     | 0.132  | 0.173  |
|                   | $BF_{10}$ | 0.215         | 2.189  | 0.482  | <b>4.852</b> | 1.620     | 0.493  | 1.699  |
| <b>Occurrence</b> |           |               |        |        |              |           |        |        |
| Age               | $r$       | <b>-0.224</b> | -0.096 | -0.159 | -0.091       | -0.091    | -0.115 | -0.149 |
|                   | $BF_{10}$ | <b>12.761</b> | 0.216  | 1.065  | 0.200        | 0.198     | 0.319  | 0.789  |
| <b>Coverage</b>   |           |               |        |        |              |           |        |        |
| Age               | $r$       | -0.137        | 0.061  | 0.038  | 0.031        | 0.024     | -0.022 | -0.031 |
|                   | $BF_{10}$ | 0.550         | 0.127  | 0.102  | 0.098        | 0.094     | 0.093  | 0.098  |
| <b>GFP</b>        |           |               |        |        |              |           |        |        |
| Age               | $r$       | -0.033        | 0.006  | -0.004 | -0.003       | -1.836e-5 | -0.016 | -0.025 |
|                   | $BF_{10}$ | 0.099         | 0.090  | 0.089  | 0.089        | 0.089     | 0.092  | 0.095  |

Correlations with substantial evidence are highlighted in bold.

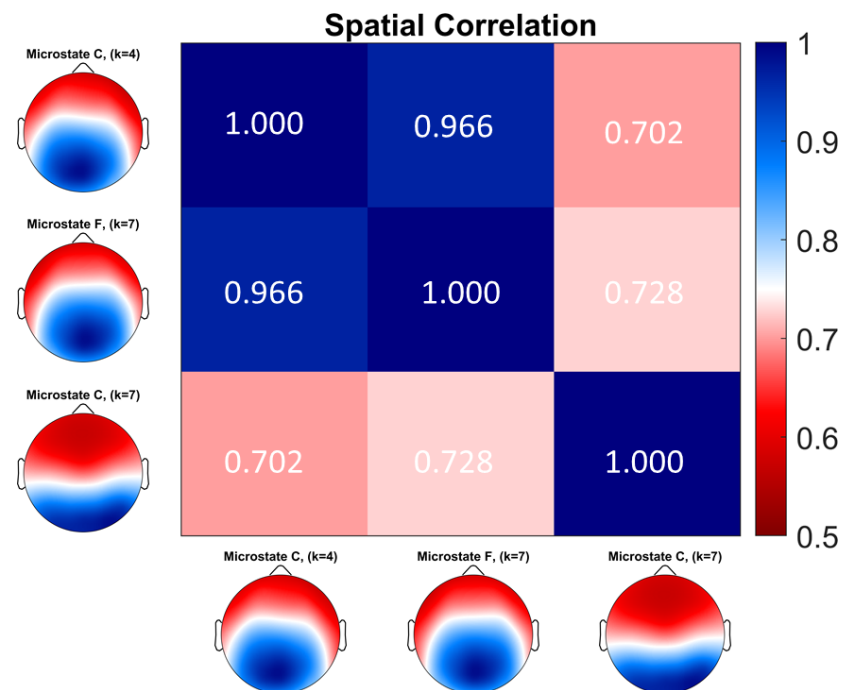

**Figure S1.** Plot of spatial correlations between microstate C, when  $k = 4$  (Top), and microstates C and F, when  $k = 7$  (Middle and Bottom). All topographies yielded a high correlation values ( $r > 0.7$ ). Microstate C, when  $k=4$  and microstate F, when  $k = 7$ , had a very high spatial correlation value confirming hypothesis, that spatially similar microstates might be merged into a single microstate, when suboptimal number of clusters is used. Additionally, both topographies had posterior activity and visually were similar to microstate C, reported in study by Pipinis et al. [16].
